# Supplementary material
Source: Springer Nature journal article supplement (https://www.springermedizin.de/resource/supplementary/12913_2013_2720_MOESM2_ESM.pdf/9531120)
Supplement: MOESM2 [file 9531120]

Identification

1,823 records identified through  
database searching

Medline n=874  
Embase n=660  
CINAHL n=181  
PsycINFO n=44  
Scopus n=64

27 tools identified through other  
sources

Screening

1,515 records after  
duplicates removed

1,542 records/other sources screened

1,488 records /other  
sources excluded on  
the basis of title and  
abstract

Eligibility

54 full text articles/other sources  
assessed for eligibility

28 full text  
articles/other  
sources excluded,  
with reasons

Included

26 tools included in narrative  
synthesis
